# Cell-to-cell Mathematical Modeling of Arrhythmia Phenomena in the Heart

Gabriel López Garza<sup>1</sup>, Nicolás Mata A.<sup>2</sup>, Román Alonso G.,<sup>2</sup> Godínez Fernández J. F.<sup>2</sup>, Castro García M. A.<sup>2</sup>

1. *Mathematics Department, Universidad Autónoma Metropolitana Iztapalapa Ciudad de México, México.*

2. *Electric Engineering Department, Universidad Autónoma Metropolitana Iztapalapa, Ciudad de México, México*

---

## Abstract

With an aperiodic, self-similar distribution of two-dimensional arrangement of atrial cells, it is possible to simulate such phenomena as Fibrillation, Fluttering, and a sequence of Fibrillation-Fluttering. The topology of a network of cells may facilitate the initiation and development of arrhythmias such as Fluttering and Fibrillation. Using a GPU parallel architecture, two basic cell topologies were considered in this simulation, an aperiodic, fractal distribution of connections among 462 cells, and a chessboard-like geometry of  $60 \times 60$  and  $600 \times 600$  cells. With a complex set of initial conditions, it is possible to produce tissue behavior that may be identified with arrhythmias. Finally, we found several sets of initial conditions that show how a mesh of cells may exhibit Fibrillation that evolves into Fluttering.

*Keywords:* Fibrillation, Fluttering, Arrhythmia, Pseudo-Electrogram, Mathematical modeling.

---

## 1. Introduction

For the sake of mathematical simplicity, we define only two types of arrhythmia in excitable media. One type is known as *Fluttering* and is related to reentrant waves of excitation, which remain in a self-perpetuating steady state. The second and more complex type of arrhythmia considered in this article is known as *Fibrillation*. Meanwhile, Fluttering is adequately described employing continuous or cell-to-cell modeling; the Fibrillation phenomenon is

8 more difficult to simulate with deterministic models. Since the first research  
9 papers, some authors, [5], [38], considered that Fibrillation could only be  
10 approached mathematically on a statistical basis, mainly due to the random  
11 distribution of anastomosis fibers in the heart. This standpoint is still in use  
12 [33], [34], [36], [42], but the primary mechanisms of flutter and Fibrillation  
13 are not fully understood. The researchers still have incomplete knowledge  
14 of how arrhythmias, such as ventricular Fibrillation, begin and develop. In  
15 opposition to the statistical basis thesis, we present a deterministic model  
16 in which we introduce complexity in the cellular network geometry as a fac-  
17 tor for the generation of arrhythmias. In a network with simple topology,  
18 we produce Fibrillation by adding a set of complex initial conditions in a  
19 completely deterministic set of ordinary differential equations.

20 In this article, we study some of the consequences obtained by modeling  
21 weakly connected networks through different distributions of excitable cells  
22 within the mesh, what we call *the geometry of the network*. In this context,  
23 we argue in subsection 3 why cell-to-cell modeling fits better than the con-  
24 tinuous model, at least to model the arrhythmia. We will illustrate in the  
25 Methods section 2, that neither the diffusivity provided by partial differential  
26 equations nor by the cell-to-cell coupling requires a complex dynamics in the  
27 cells to produce fibrillation and flutter phenomena. Elliptic-type operators  
28 give diffusivity in continuous mathematical modeling and also in cell-to-cell  
29 modeling using *weakly coupled variables* (see section 3.0.1). Nevertheless, we  
30 show *in silico* that fibrillation and Fluttering can be modeled even by using  
31 the simplest excitable cell models including only a few variables and “realistic  
32 models of heart cells” and compare the silico experiments of both realistic  
33 vs. few variables models [22], [24].

34 The main difference between flutter and Fibrillation, according to the  
35 classic definitions [38], is the randomness of Fibrillation as opposed to the  
36 regularity of flutter. Randomness precludes sharp, well-defined wavefronts.  
37 One contribution of our work is to introduce some degree of complexity (the  
38 tiling of Figure 5) instead of randomness to present an *in silico* phenomena,  
39 which can be identified with Fibrillation. We simulated Fibrillation in a  
40 simple Chessboard geometry in a mesh of  $60 \times 60$  and a mesh of  $600 \times 600$   
41 cells by introducing a complex set of initial conditions. This Fibrillation is  
42 achieved with both models, two variables and Nygren model of the human  
43 heart. Another novelty in the present paper is that, contrary to the commonly  
44 established, Fluttering can be produced at a cellular level by a dynamic  
45 obstacle formed with a few cells and also by fixed non-dynamical obstacles

46 (for a definition see section 2.2.1). Finally, we found several sets of initial  
47 conditions that show how, even in the simplest mesh of cells, they may exhibit  
48 Fibrillation that evolves into Fluttering. This phenomenon that is well known  
49 in medical literature, for the best of our knowledge, is for the first time shown  
50 with human heart cell models.

## 51 **2. Methods**

### 52 *2.1. Individual Cell models*

53 In this work, we use two-variable models of excitable cells [1], [4], [12],  
54 [24], as well as a physiologically accurate model of Nygren and coworkers  
55 [27]. The idea of using two variables vs. many variables models is to extract  
56 the properties of a net of cells that depend only on the excitable media and  
57 do not depend on the limitations of individual cell models.

58 The models of excitable cells included here, as usual, go through four  
59 stages [40]: resting, exciting, excited, and refractory states; also, the models  
60 of coupled cells provide solitary waves flexible enough to flutter and fibrillate.  
61 In this way, the models represent observables in real tissue to some extent (for  
62 a mathematical definition of *observable* see section 3.0.1). The convenience  
63 and relevance of utilizing more complex models of individual cells is discussed  
64 in sections 5 and 6.

#### 65 *2.1.1. Realistic Models*

66 There are many physiologically accurate models of excitable cells in the  
67 Heart, among them: Courtemanche et al., [8], Nygren et al., [27]; Lindblad  
68 et al., [21]. In this paper, we use Nygren et al. model (N), taking into  
69 account that the N model reconstructs action potential data that represent  
70 recordings from human atrial cells. In the N model, the sustained outward  $K^+$   
71 current determines the duration of the action potential (AP). On the other  
72 hand, the AP shape during the peak and plateau phases is determined by  
73 transient outward  $K^+$  current,  $I_{sus}$ , and L-type  $Ca^{2+}$  current. The N model has  
74 29 variables: 12 transmembrane currents, a two-compartment sarcoplasmic  
75 reticulum (SR), and restricted subsarcolemmal space for calcium dynamics  
76 handling and calcium buffering.

77 Regarding the number of variables, simulating a system of 360 000 cells,  
78 as we do in this work, is somehow onerous in computational terms. For  
79 example, 360 000 times 29 gives a system of ODE of 104 400 variables. For  
80 instance, simulating 15 seconds with step-size of the order of milliseconds may

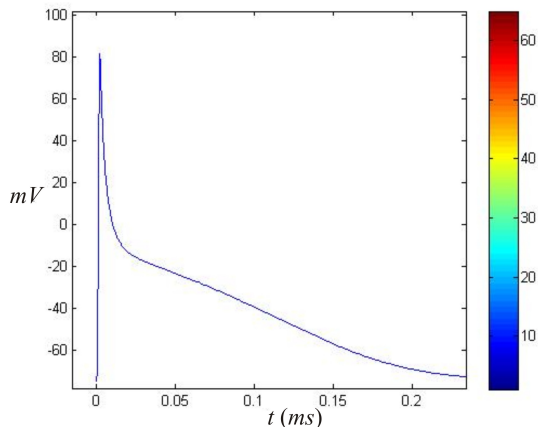

Figure (1) Color code of the AP corresponding to Nygren's model. In the video captures and videos, the deep blue color corresponds to a rest state and deep red to a maximum of the action potential in the Nygren et al. cell model.

81 illustrate what we mean by “onerous computationally”. To accomplish this  
82 task, we employed parallel architecture using Nvidia GPU (RTX 2080 Ti),  
83 and we developed it with C-CUDA libraries. The Procedures and Algorithms  
84 that we used are described in Nicolás and coworkers [25]. To solve the ODE  
85 systems, we implemented a Runge-Kutta numerical method of order four  
86 with absolute error tolerances of  $10^{-6}$ .

### 87 2.1.2. Modeling Atrial fibrillation

88 For the Nygren model, we used the data in Cherry et al. [7] and refer-  
89 ences therein to simulate electrophysiological changes that occur as a result of  
90 sustained Atrial Fibrillation. Specifically,  $I_{Ca,L}$  is decreased 30 percent of its  
91 original value, and  $I_{to}$  and  $I_{Kur}$  are both decreased to 50 percent of their origi-  
92 nal values. As mentioned in Cherry et al., APs are triangular in morphology  
93 at all cycle lengths and are shorter under these conditions. Additionally, rate  
94 adaptation is largely abolished. The reduction in rate adaptation shown by  
95 the model is in agreement with some experimental studies of chronic Atrial  
96 Fibrillation (AF) and tissues obtained from right atrial appendage tissue of  
97 patients with chronic AF (see references therein [7]). Low conductivity of  
98 cells in the heart is associated with ischemia [18], and in experiments, con-  
99 ductivity may be lowered pharmacologically by heptanol [5].

100 Finally, to simulate Fibrillation as those in Figure 15, we found sets of  
101 initial conditions by implementing a random search in both models N and



102 B. In generating in the net the initial conditions, we alternate stimulated  
103 cells with refractory state cells. These complex sets of initial conditions  
104 in continuous media modeled with partial differential equations represent  
105 a discontinuous function and, therefore, highly improbable sets. However,  
106 modeling cell-to-cell such complex sets of initial conditions is not improbable  
107 since its discontinuity is inherent to the heart tissue structure. Discontinuity  
108 in the real tissue is another argument that favors ODE modeling over PDE  
109 modeling. Summarizing, we consider two types of initial conditions: (a) One  
110 small connected set of exciting cells surrounded by refractory cells; (b) Many  
111 small islands of exciting cells scattered throughout the entire net mixed with  
112 refractory cells. The interested reader may obtain our data on the sets of  
113 initial conditions under request to the corresponding author.

114 A vast difference exists among two-variable models and realistic ones,  
115 regarding, for instance, the number of observable phenomena. Nevertheless,  
116 all ordinary differential equations models we used have four states. A rest  
117 state corresponding to a minimum value of the AP variable; an exciting state,  
118 which corresponds to a negative derivative of the AP profile; an excited state,  
119 corresponding to the maximum of the AP profile; and a refractory state,  
120 associated to a positive derivative of the AP profile. In figures 1 and 2(b),  
121 the rest state is represented in the deepest blue color, and the excited state  
122 is represented in the darkest red.

### 123 *2.1.3. Simple ordinary differential equations models*

124 For this part, although only the experiments with the Barkley [4] model  
125 are reported, the Fitzhugh-Nagumo model and the Aliev-Panfilov model  
126 whose description is elsewhere [12], [24], [1] were also subject of experimenta-  
127 tion. Since results obtained for Fluttering and Fibrillation are similar to those  
128 obtained with the Barkley model, Fitzhugh-Nagumo, and Aliev-Panfilov, we  
129 do not include plots of the last two, and from now on we will only refer to  
130 the Barkley model when we talk about two-variable models. If a suitable  
131 geometry of the cell system is introduced (see section 2.2), it is possible to  
132 represent Fibrillation and flutter phenomena with all these models. They  
133 are two-variable models, as is well known, and they are dynamical bi-stable  
134 systems. For these systems, the existence of limit cycles is well established  
135 in the mathematical theory, and even *analytical* approximations of physio-  
136 logically relevant limit cycles in a region between heteroclinic trajectories are  
137 possible to calculate [17].

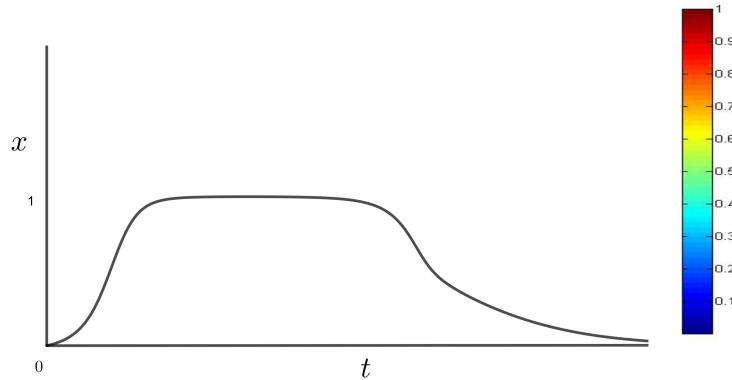

Figure (2) The AP corresponding to the Barkley model of equation (1), recall that  $x$  and  $t$  are adimensional for this model. Each value of  $x$  of the plot in the left corresponds a color to each height. The color bar corresponds to the Barkley model's states in the videos and two-dimensional plots shown in this paper. Deep blue corresponds to rest state  $x(t) = 0$  and the darkest red corresponds to  $x(t) = 1$ .

138 The Barkley model used in this paper is the following

$$\begin{aligned} \frac{dx}{dt} &= \frac{1}{\varepsilon} x(1-x) \left( x - \frac{y+b}{a} \right) \\ \frac{dy}{dt} &= gx - y, \end{aligned} \quad (1)$$

139 where  $a, b, g, \varepsilon$  are fixed parameters. Figure 2 shows an AP of Barkley model  
140 with initial conditions  $x(0) = 0.4, y(0) = 0$ . The variable  $x$  in this arti-  
141 cle corresponds to an adimensional voltage, and may be identified with the  
142 variable  $V$  of the Nygren model.

### 143 2.2. Cell-to-cell Nets Geometry

144 The geometry in cellular systems can be determined by considering the  
145 geometry of the individual cells and how they are connected. For example,  
146 the working cells in the auricula in the heart are mostly cylindrical and are  
147 connected in a way that favors the longitudinal transmission of Action Po-  
148 tentials [35]. By comparison, brain cells have extremely branched forms, and  
149 their connections can reach a complexity that is far from being understood  
150 in its entirety [31]. In the following system,

$$\dot{\alpha}_i = G_i(\alpha_i) + \varepsilon_{ij} \sum_{j \neq i} (\alpha_j - \alpha_i), \quad \alpha_i \in \mathbb{R}^n, \quad (2)$$

151 where  $n$  represents the number of variables of each cell. The geometry of  
152 the network (and hence the diffusivity) is determined by the values of  $\varepsilon_{ij}$   
153 different from zero. So, equation (2) can be written as a vectorial equation  
154 with  $\alpha = (\alpha_1, \dots, \alpha_n)$ ,  $G(\alpha) = (G_1(\alpha), \dots, G_n(\alpha))$ . So, as an illustration,  
155 for two variables with the Barkley model in equation (1), the system (2) has  
156 the form

$$\begin{aligned} \frac{dx_i}{dt} &= \frac{1}{\varepsilon} x_i (1 - x_i) \left( x_i - \frac{y_i + b}{a} \right) + \varepsilon_{ij} \sum_{i \neq j} (x_j - x_i), & (3) \\ \frac{dy_i}{dt} &= gx_i - y_i, \quad i = 1, \dots, N, \end{aligned}$$

157 where  $N$  is the number of cells in the system and  $\varepsilon_{ij} = 0$  for unconnected cells.  
158 Notice that only the  $x_i$  variables are coupled to each other as corresponds to  
159 variables related to the Action Potential in the heart's cells. Similarly, for  
160 the N model of atrial cells of 28 variables, only the voltage is coupled.

161 In practice, the use of rectangular and cubic matrices are the most com-  
162 monly used [9], [13], [28], [41], without considering the complex geometry of  
163 the cytoarchitecture of the network that exists in the tissues of living be-  
164 ings. Systems made of systems of equations of the form (2) are known as  
165 *weakly connected networks* (WCN) and have a vast number of applications in  
166 neurophysiology [14]; cardiology [41], [9], [28]; and many other sciences. In  
167 general, WCN have applications in every system of cells connected through  
168 gap junctions, such as those in atrial tissue in the human heart.

### 169 2.2.1. Obstacles

170 There are two types of obstacles to be considered: dynamical and static.  
171 Dynamical obstacles are formed by individuals or groups of cells in a refrac-  
172 tory or excitable or excited state. Static obstacles are formed by objects that  
173 do not change in time. They may correspond to fibroblast, adiposity in real  
174 tissue, or dead tissue due to heart attacks. In this article, we consider only  
175 dynamic obstacles.

### 176 2.2.2. Tiling

177 One of the central thesis of this work is that, under certain circumstances,  
178 an intricate connection between cells is essential in the generation of flutter

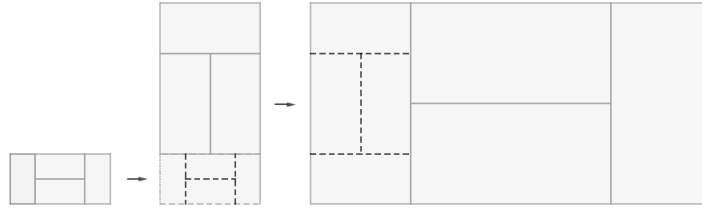

Figure (3) The procedure presented in the Figure is repeated several times to produce the tiling of Figure 5. Note the fractal structure obtained.

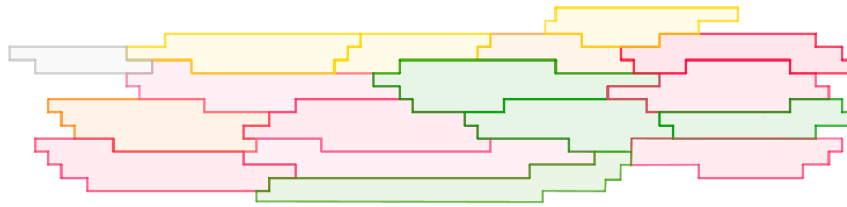

Figure (4) Here is shown one of many possible representations of working cells in the heart. They are not distributed randomly but following the distribution described in Figure 5, where the reader can find the color's code. The arrangement here presented corresponds to the up and left corner of Figure 5.

179 and Fibrillation. We take as a paradigm of cell connections, hence the in-  
180 trinsic geometry of the cells, those of the working cells in the auricula, and  
181 the ventricle in the heart. In the literature, histological studies of heart's  
182 cells are available [35]. Nevertheless, mathematical models, including the  
183 real geometry of the cells, are more scarce. Spach and Heidlage [36, Fig. 1]  
184 give a schematic representation myocardial architecture of 33 cells in a two-  
185 dimensional array. Following their representation, Figure 4 depicts a two  
186 dimensional model of cells, but our model is not based in real cells as in [36]  
187 but in a distribution generated by an aperiodic tiling called “Table” which  
188 we describe below. After the cells' connectivity is fixed, it is possible to estab-  
189 lish a correspondent cell geometry, as in Figure 4. Note that the random-like  
190 distribution of the cells is not for real; in Figure 4 are represented in the up  
191 and left corner in Figure 5. This distribution can be verified, noting that the  
192 code of colors corresponds to the same cells, meaning green for cells with six  
193 connections, pink for cells with five connections, and so on. Observe that in  
194 our figure, cell connections occur only in the vertical edges where most of the  
195 standard electrical coupling between cells have place [35].

196 The values  $\varepsilon_{i,j}$  different from zero in equation (2) give an adjacency ma-

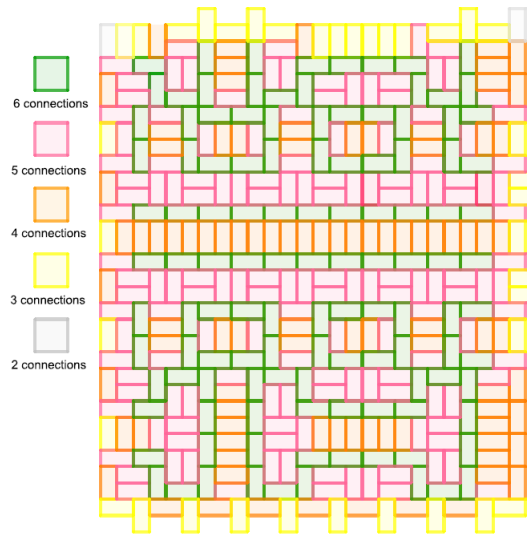

Figure (5) Example of a “Table” tiling showing the number of connections of each cell. Cells in green are connected with six cells, cells in pink are connected with five cells, and so on, as indicated in the figure’s left-hand side.

197 trix between cells which represents the geometry of the entire net. In this  
198 paper, we use a “Table” distribution of connections among cells. A *Table*  
199 is a polygon belonging to the class that can be tiled by a finite number  
200 of smaller, congruent copies of itself (see [32], where the properties of the  
201 “Table” as tiling-dynamical-system are studied). We used this tiling for the  
202 following reasons. a) It is an aperiodic tiling of the plane so that some degree  
203 of complexity is intrinsic in the adjacency matrix. b) The tiling is self-similar,  
204 so it does possess a fractal structure. c) Each cell is connected to an average  
205 of 4.86 cells, which is a good 2D approximation compared with an average  
206 of 9.1 reported from experimental data measures by Hoyt et al. [15] for  
207 three-dimensional structures. Besides, the connectivity approaches that of  
208 the cells in the Spach diagrams of Figure 1 in [36], which represents a sample  
209 of two-dimensional tissue cells with average two-dimensional connectivity of  
210 4.66 cells. d) The “Table” aperiodic setting provides the more simple ar-  
211 rangement in the authors’ opinion, which satisfies the mentioned properties.

212

213 Figure 5 shows a tiling (see Figure 5) used in our in silico experiments.  
214 This arrangement is only one sample of an infinite number of such aperiodic  
215 tilings. It is necessary to assign each cell a number to set a matrix corre-

216 sponding to the tiling in Figure 5. Then, once the assignment is completed,  
217 the adjacency matrix can be settled down. Algorithms to construct the *Table*  
218 and other aperiodic tilings are well known, but finding algorithms to set the  
219 associated adjacency matrix of such tilings is still an open problem, to the  
220 best of the authors' knowledge. The recursive procedure for the self-similar  
221 aperiodic tiling is shown in Figure 3.

### 222 *2.3. Flutter, Fibrillation, and pseudo-EG mathematical definitions*

223 In this paper, we depart from the classical definitions of Flutter and  
224 Fibrillation in use to formulate the following definition that applies to the  
225 rest of the article.

226 **Definition.** Flutter and Fibrillation are reentrant waves of excitation which  
227 remain in a self-perpetuating steady-state; flutter having a periodic (or nearly  
228 periodic) pseudo-electrogram (pseudo-EG), and Fibrillation having a non-  
229 periodic pseudo-electrogram. Alternatively, we call Fibrillation a steady-  
230 state, self-perpetuating pattern of systems of cells without a defined front or  
231 back wave.

#### 232 *2.3.1. Mathematical Pseudo-EG*

233 Following the classical definitions, we consider flutter and Fibrillation as  
234 self-generating phenomena. Flutter is considered a periodic wave of waves  
235 contrary to Fibrillation, which is considered a highly complex non-periodic  
236 wave or waves. A precise difference between flutter and Fibrillation is pro-  
237 vided by the pseudo-EG which is calculated by the following formula:

$$EG(t) = \sum_{i \neq j} g_{i,j} (V_j(t) - V_i(t)), \quad (4)$$

238 which is a non-weighted, two-dimensional version of the formula of Kazbanov  
239 et al. in [16]. Observe that the distance between cells may be taken into  
240 account handling specific weights; however, in this work this parameter is  
241 neglected since the size of the modeled tissue is small and, more importantly,  
242 the geometry and thus the real distance between cells is not modeled in our  
243 study, so that weight due to the distance may not be considered.

#### 244 *2.3.2. Electrogram analysis*

245 One of the most widely used techniques for analyzing fluctuations in  
246 the cardiac cycle period is the detrended fluctuation analysis (DFA). This  
247 technique has the advantage that it prevents the detection of inexistent long

248 term correlations produced by the non-stationarity of the time series. Given  
249 the complexity of the electrograms analyzed, in this work, we used the DFA  
250 technique to determine if they present either a random behavior or a temporal  
251 structure with long term correlations, which gave us information about the  
252 propagation of the electrical signal obtained from the in silico experiments.  
253 The scaling exponents  $\alpha$  obtained from the DFA analyses were evaluated as  
254 previously described by Peng et al. [29]. In short, a scaling exponent  $\alpha$  near  
255 or equal to 0.5 indicates a random or uncorrelated behavior, whereas a value  
256 near or equal to 1 indicates long-term correlations in the time series; that is,  
257 current data are statistically correlated with previous data, which reflects a  
258 non-random behavior.

### 259 3. Theory

260 The concept of observable has been used through the article; next, we  
261 provide a mathematical definition. We also discuss a comparison between  
262 PDE and cell-to-cell models, which is relevant for the understanding of our  
263 results.

#### 264 3.0.1. Observables

265 In mathematical modeling, the dynamics of the cells that form living  
266 beings (or that represent other excitable means) are represented by dynamic  
267 systems of form,

$$\dot{y} = G(y), \quad y \in \mathcal{Y} \subset \mathbb{R}^N, \quad (5)$$

where the dot denotes the time's derivative. So, cells are thought of as not wholly known (so far) dynamical systems, let us say

$$\dot{x} = F(x), \quad x \in \mathcal{X} \subset \mathbb{R}^M, N < M, \quad (6)$$

268 of which (5) is a representation, and scientists expect that the model  $G$  in  
269 some sense approaches  $F$ , which remains partially unknown. More formally,  
270 (5) is a model of (6) if there exists a continuous function (called observation  
271 [14])  $h : \mathcal{X} \rightarrow \mathcal{Y}$  such that if  $x(t)$  is a solution of (6), then  $y(t) = h(x(t))$  is  
272 a solution of (5). In practice, many information of system (6) is unknown,  
273 for instance, the dimension of the space (i. e., in this instance, the actual  
274 number of variables of the system). In many cases, a model could be a  
275 rough representation of the real system. As mentioned by Hoppenstead and



276 Izhikevich [14], for example when (6) has a periodic solution and the model  
277 (5) is one dimensional, the observation  $h(x(t))$  cannot be a solution of (5)  
278 unless  $h$  maps the limit cycle to a point. The existence of the function  $h$  and  
279 its properties are purely theoretic but allow us to speak about the relations  
280 of the real system (6) with the model in a mathematical fashion. As an  
281 example the variable  $y(t) = h(x(t))$  is called an *observable*. In this article,  
282 the dimension of  $\mathcal{Y}$  is bigger or equal than 2 so, we call *observable* to each of  
283 the  $y$ 's component functions.

284 As science advances, mathematical models of cells include an increasing  
285 number of observables and each observable with an increasing refinement  
286 following experimental data. In this way, we obtain systems of complex  
287 differential equations that include an increasing number of equations. A  
288 typical example of this phenomena is the development in the study of the  
289 sinoatrial node cells in the heart (SAN) [6], [26], (for a detailed review of the  
290 SAN mathematical models see [19]).

However, this is just the first step on the way to modeling the actual cell  
tissue. A second step consists of forming a system of systems of equations by  
coupling variables among different systems, let say  $n$  different systems like  
the following

$$\dot{y}_i = G_i(y_i) + C_i(y_1, y_2, \dots, y_n), \quad i = 1, \dots, n. \quad (7)$$

291 A very used example of a coupling functions  $C_i$  are linear functions of the form  
292  $\varepsilon_{ij} \sum_{j \neq i} (y_j - y_i)$  where  $\varepsilon_{ij}$  are small (experimentally obtained) parameters  
293 and the values assigned to  $j$  depend on the geometry of the net. There are  
294 at least two ways of modeling excitable media. One is by utilizing partial  
295 differential equations (PDE) to represent the diffusive nature of the media.  
296 Another is by establishing a system of cells, each cell, in turn, is a system  
297 of ordinary differential equations (ODE). In ordinary differential equations,  
298 diffusion of the excitatory wave is modeled by coupling appropriate variables,  
299 for instance, the Action Potential (AP) in excitable biological cells. In this  
300 paper, we call *continuous* mathematical modeling to the first form (PDE),  
301 and the last form (ODE) is what we call *cell-to-cell modeling*.

### 302 3.0.2. Continuous vs. cell-to-cell modeling

303 Continuous mathematical modeling of anisotropic media such as ventric-  
304 ular tissue, normally includes fiber patterns and the continuous rotation of

305 the fiber axis [11], so that the equations have the form:

$$\frac{\partial V}{\partial t} = \nabla \cdot (D \nabla V) - I(V, y), \quad (8)$$

$$\frac{\partial y}{\partial t} = g(V, y) \quad (9)$$

$$\hat{n} \cdot (D \nabla V) = 0. \quad (10)$$

306 Where  $V = V(t, x_1, x_2, x_3)$  is the membrane potential,  $(x_1, x_2, x_3)$  in  $\Omega \subset \mathbb{R}^3$ ,  
 307  $I$  is the total current through the membrane,  $y$  is a vector of gate variables  
 308 describing the dynamics of the various currents that constitute  $I$ ,  $\nabla V$  denotes  
 309 the gradient operator, and  $D$  is a conductivity tensor divided cell surface to  
 310 volume ratio times the membrane capacitance of the cell. We will show  
 311 that a system of equations (3) is equivalent to the system (8), (9). Note  
 312 that equation (10) represents Neumann boundary conditions where  $\hat{n}$  is the  
 313 normal to  $\partial\Omega$ . To begin with, observe that the tensor  $D$  is of the form

$$D = \begin{pmatrix} D_{11} & D_{12} & 0 \\ D_{21} & D_{22} & 0 \\ 0 & 0 & D_{33} \end{pmatrix},$$

314 where  $D_{ij}$  are functions of diffusivities parallel and perpendicular to the fiber,  
 315 and  $\theta(x_3)$ , the angle between the fiber to the axis of each plane. In the setting  
 316 of [11], is easily shown that for a two-dimensional model, since  $\theta(x_3) \equiv 0$ ,  
 317 then  $D$  becomes

$$D = \begin{pmatrix} D_{11} & 0 & 0 \\ 0 & D_{22} & 0 \\ 0 & 0 & 0 \end{pmatrix},$$

318 where now  $D_{11}, D_{22}$  are constants, so that the elliptic operator  $\nabla \cdot (D \nabla V)$   
 319 in equation (8) becomes simply

$$\nabla \cdot (D \nabla V) = D_{11} \frac{\partial^2 V}{\partial x_1^2} + D_{22} \frac{\partial^2 V}{\partial x_2^2}.$$

320 After discretization of the second partial derivatives we obtain

$$\nabla \cdot (D \nabla V) = \left\{ \frac{D_{11}}{\Delta^2} (V_{i+1,j}^n - 2V_{i,j}^n + V_{i-1,j}^n) + \frac{D_{22}}{\Delta^2} (V_{i,j+1}^n - 2V_{i,j}^n + V_{i,j-1}^n) \right\}_{i,j}, \quad (11)$$

321 a formula which is valid for interior cells in the grid. Since in many articles  
322 including [11] the grid spacing is about  $\Delta \approx 200 - 300 \mu\text{m}$  which is bigger  
323 than the length of the cell,  $\approx 80 \mu\text{m}$  [35], is worth to mention that PDE  
324 continuous approach is, in this case, not better than cell-to-cell modeling  
325 whatsoever. Moreover, note that equation (11) corresponds to a rectangu-  
326 lar grid of square cells (of much bigger dimensions than actual heart cells),  
327 meaning a chessboard-like geometry of the cells. In this way, a complex  
328 geometry, such as that depicted in Figure 4, cannot be represented by the  
329 elliptic operator in equation (8) since such an arrangement can not at all be  
330 represented by tridiagonal matrices such as those in equation (11).

331 A further consideration regarding the mathematics in this article must  
332 be considered. Flutter and arrhythmia will appear as solutions to systems  
333 of ODEs for a particular set of initial conditions. However, somehow the  
334 solutions appear in some fashion unpredictable since they occur after global  
335 bifurcations of the parameters given by the conductivity and of the distribu-  
336 tion of conductivity. Hence, only after integrating the systems will emerge  
337 more of the most striking patterns of the next section in an unexpected form.  
338 Although the spirals formed by the Barkley model [2], [3], [4], and other mod-  
339 els [10] have been extensively studied, the study of the combination of spirals,  
340 collisions of spirals, and spirals emerging after a massive dynamic blocking  
341 is still of interest regarding Fibrillation.

#### 342 4. Results

343 In this paper, the waves mentioned in the definitions above are travel-  
344 ing waves with a defined front and back given by the ordinary differential  
345 equations of the different bistable ODE systems. As mentioned in section  
346 2, systems with no apparent wave's fronts and backs are noticeable. Never-  
347 theless, a periodic pseudo-EG may appear after time in some of the systems  
348 formed with a small number of cells. While flutter is produced by the collision  
349 of traveling waves with dynamical or static obstacles at a macroscopic level  
350 as in the classic definition, there is a difference in this document with the  
351 standard definitions since microscopic (cell-to-cell) collisions are considered,  
352 and very intricate patterns may happen as, for instance, these in Figures 13  
353 and 14.

354 In both types of models, two-variables and realistic Nygren model, we  
355 found that by using the tiling distribution described in Figure 5 the propa-  
356 gation of voltage is allowed in a very efficient way under normal conditions.

Table (1) Detrended Fluctuation Analysis for N model (atrial cells)

| Network          | Initial Conditions | Figure        | pseudo-EG      | $\alpha$ |
|------------------|--------------------|---------------|----------------|----------|
| aperiodic tiling | (a)                | Figure 8      | quasi periodic | 1.0515   |
| aperiodic tiling | (b)                | Figure 7(b)   | quasi periodic | 1.0130   |
| $60 \times 60$   | (a)                | Figure 10     | quasi periodic | 0.7790   |
| $60 \times 60$   | (b)                | Figure 11     | non-periodic   | 0.5445   |
| $600 \times 600$ | (a)                | Figure 12 (d) | non-periodic   | 0.4192   |
| $600 \times 600$ | (b)                | Figure 13     | non-periodic   | 0.4413   |
| $600 \times 600$ | (b)                | Figure 14 (d) | non-periodic   | 0.5620   |
| $600 \times 600$ | (b)                | Figure 15 (b) | non-periodic   | 0.5246   |

357 Paradoxically under certain circumstances, the same topology facilitates the  
 358 generation of Fluttering.

359 Moreover, in a chessboard arrange of  $600 \times 600$  cells, we found that the  
 360 generation of some Fibrillation generated by a randomly stimulated number  
 361 of cells evolves to a stable multi-spiral which resembles Fluttering at least in  
 362 the generation of pseudo-EG with some periodic resemblance as, for instance,  
 363 in Figure 7.

364 We recall that we presented the description of the 29-variable model N in  
 365 section 2.1.1 and a two variable model B in section 2.1.3. Given that only the  
 366 Nygren model corresponds to real atrial cells in the heart, we used the DFA  
 367 technique only with this model. In Table 1 we present the  $\alpha$  values obtained  
 368 for each in silico experiment. From subsection 2.1.2, recall that there are  
 369 two types of initial conditions: (a) One small connected set of exciting cells  
 370 surrounded by refractory cells; (b) Many islands of exciting cells scattered  
 371 throughout the entire net mixed with refractory cells. We recall that a scaling  
 372 exponent  $\alpha$  near or equal to 0.5 indicates a random or uncorrelated behavior,  
 373 whereas a value near or equal to 1 indicates long term correlations in the time  
 374 series.

375 Given the coincidences between non-realistic vs. realistic models, we con-  
 376 clude that the generation of Fluttering and fibrillations does depend strongly  
 377 on the nature of the diffusive media, more than in the variables involved in the  
 378 modeling. Nevertheless, realistic models facilitate the reduction of parameter  
 379 values according to experimental data that occur during arrhythmias.

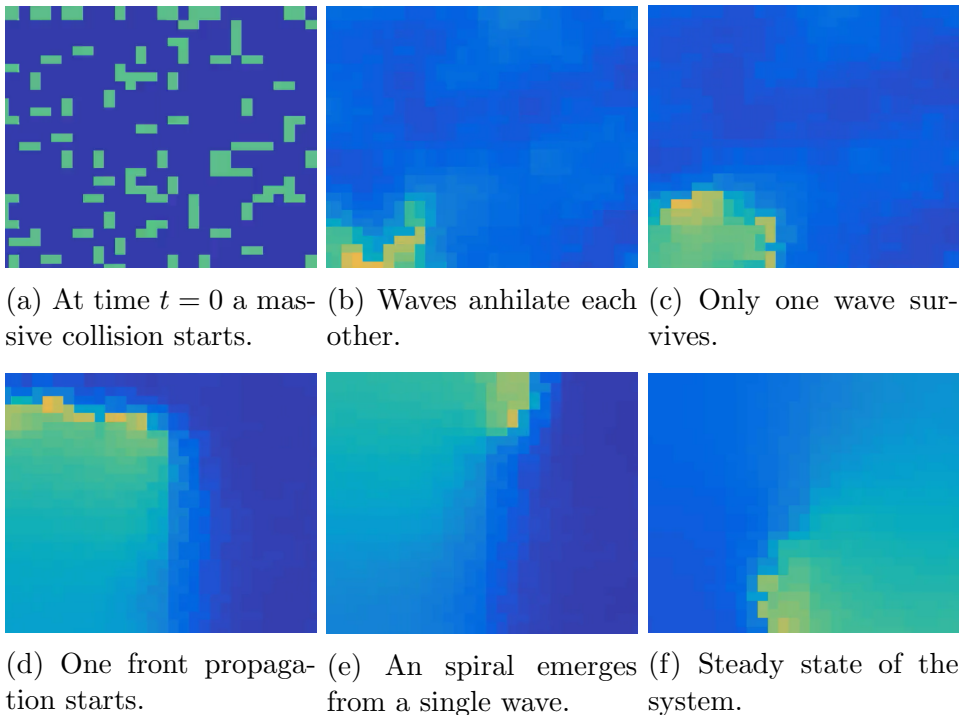

Figure (6) Massive blocking produces Fibrillation and evolves to Fluttering here in the tiling of Figure 5. The link to the video of the complete sequence is <http://pacifico.izt.uam.mx/aurelio/>.

#### 380 4.1. Fibrillation at a microscopic level case Nygren Model

381 In Figure 6 after a massive blocking with dynamical obstacles (initial  
382 conditions type (a)) in the aperiodic distribution of cells of Figure 5, an  
383 apparent Fibrillation becomes a Fluttering, i. e., a self-perpetuating spiral.  
384 This event is well known in the literature, but as far as we know, it is for the  
385 first time reproduced in silico.

386 This coincidence in the formation of spirals of the two models, one cari-  
387 cature (Barkley) and the other realistic (Nygren), provides us with evidence  
388 that the Fibrillation that becomes Fluttering occurs naturally in any diffusive  
389 media under appropriate initial conditions. Notice that the pseudo-EG after  
390 a non-periodic behavior from  $t = 0$  to  $t < 2500$  (recall that  $t$  is adimensional  
391 for Barkley model) resembles a periodic plot. See Figure 7.

392 Another interesting kind of Fluttering is produced by stimulating a small  
393 number of connected cells and blocking them with neighboring cells in a  
394 refractory state. Here, the array of cells facilitates the propagation due to its

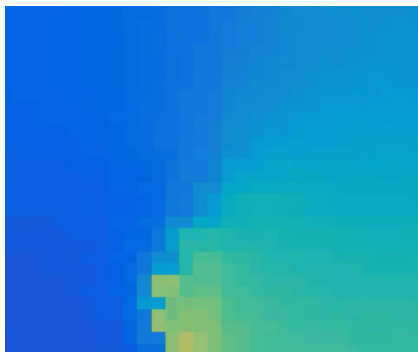

(a) Steady state of the Nygren system.

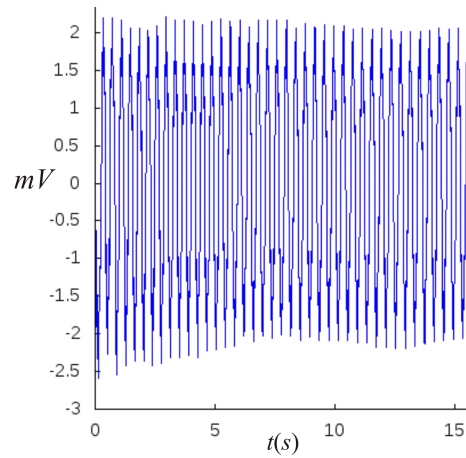

(b) Pseudo-EG For Nygren Model

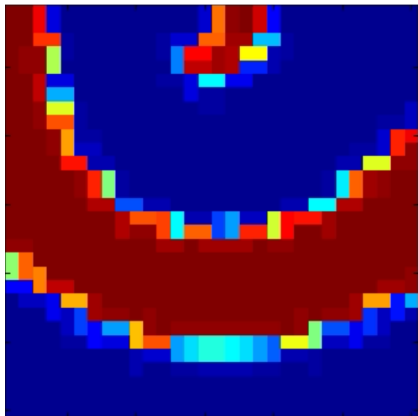

(c) Steady state of Barkley system.

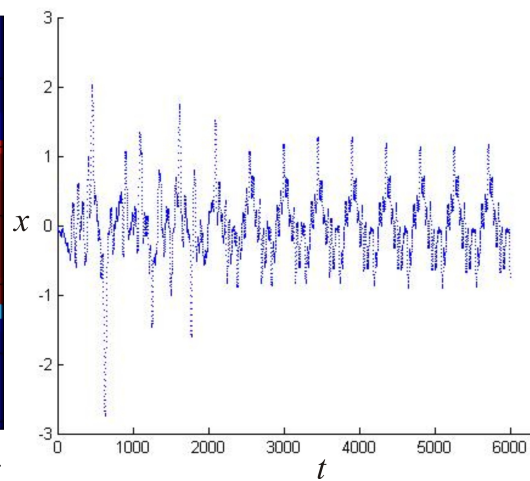

(d) Pseudo-EG for Barkley model.

Figure (7) In both Nygren and Barkley models, massive blocking produces Fibrillation, which becomes Fluttering. Noticeable differences do appear in the wavelength as a consequence of intrinsic dynamics in each model, but in both of the models under certain sets of initial conditions, a periodic self-perpetuating spiral emerges. The pseudo-EG in both Figure 7(b) and 7(d) show certain periodicity.

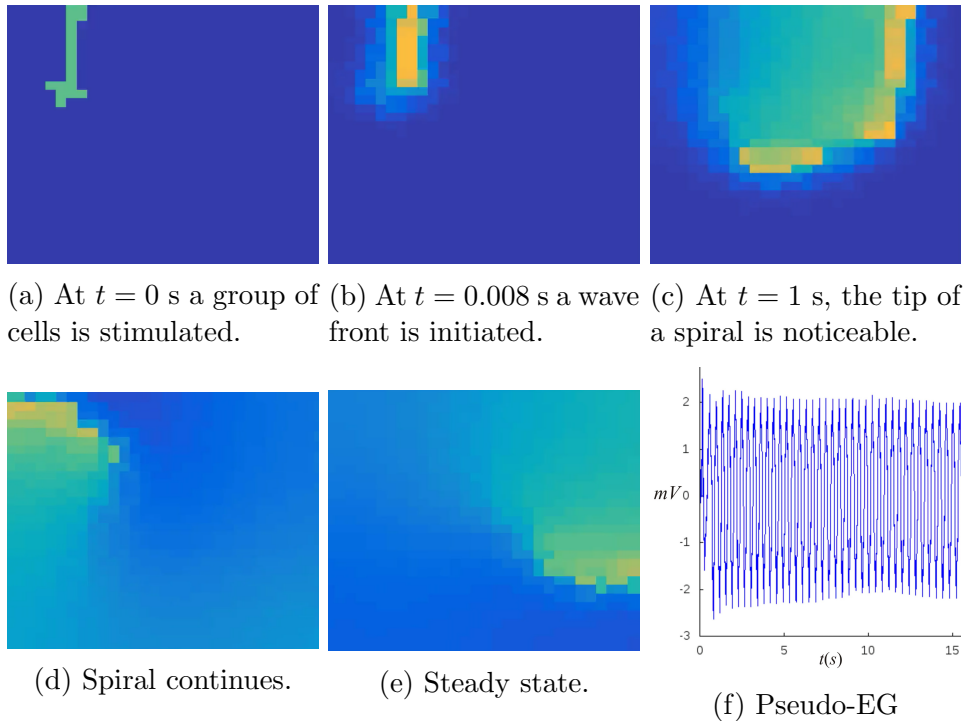

Figure (8) (a) A group of cells surrounded by cells in a refractory state is stimulated. (b), (c), (d), (e) A self-generating spiral which may be identified with Fluttering is apparent. (f) A quasiperiodic pseudo-EG is produced after a small, turbulent interval of time similar to that in Figure 7d.

395 fractal nature paradoxically when a dynamic obstacle (a group of cells out  
 396 of phase) prevents the wave from propagating. See Figure 8.

397 A similar phenomenon occurs with the Barkley model, but in this case,  
 398 by blocking only one cell. A single excited cell surrounded by refractory cells  
 399 produces (when the network has critical connectivity) an intricate pattern  
 400 of diffusion. In this way, some spirals arise due to variable cellular connec-  
 401 tivity and low conductivity. It is worth mentioning that spirals broke into  
 402 scrolls, which, according to the electrogram obtained, may be identified with  
 403 Fibrillation of the system (see Figure 9).

404 After studying the Table array, we proceed to study a more significant  
 405 number of cells but scattered in simpler arrangements. For both the Nygren  
 406 and Barkley models, we started with a square of 60 by 60 cells. Furthermore,  
 407 we continue with a 600 by 600 with the Nygren model. We present two types  
 408 of in silico experiments. One type we block a large number of cells and



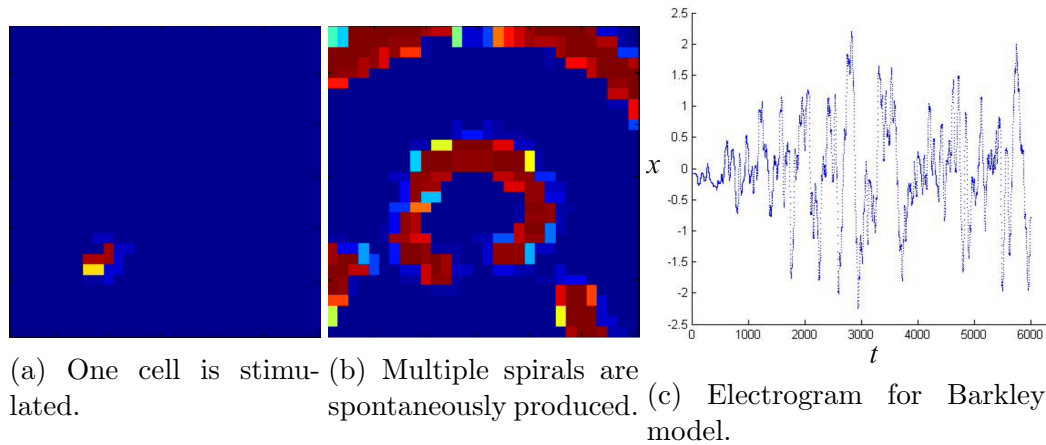

Figure (9) Barkley model produces several self-generating spirals by blocking one cell, with neighboring cells in a refractory state. The electrogram produces a noise-like signal which may be identified with Fibrillation.

409 scattered throughout the network, another group is stimulated. The second  
410 type, only a few connected cells, is stimulated and blocked by neighbors.  
411 We obtained the same phenomenon produced with the array. Hence a self-  
412 generating spiral is produced, see Figure 10.

413 In Figure 11 the same phenomenon illustrated in Figure 9 is represented  
414 in a  $60 \times 60$  array of cells. A set of initial conditions alternating refractory  
415 state cells with stimulated cells produces a pattern that may be identified  
416 with Fibrillation due to the complex pattern of the pseudo-EG.

417 With a  $600 \times 600$  cell array, a spiral is produced with a small group  
418 of stimulated cells surrounded by cells in a refractory state. See Figure 12.  
419 Observe that assuming that a cell has  $100 \mu\text{m}$  of length, a square of 360 000  
420 cells is equivalent to  $36 \text{ mm}^2$  of tissue.

421 A fascinating phenomenon occurs in a  $600 \times 600$  array when a large  
422 group of stimulated, scattered cells through the entire net is surrounded by  
423 refractory cells. Fibrillation occurs during several seconds, and under certain  
424 initial conditions, it becomes Fluttering, which persists in a stationary and  
425 complex spiral. See Figure 13.

426 Moreover, in the  $600 \times 600$  array, we can produce with a set of initial  
427 conditions a more complex pattern than in Figure 13 f). Many self-generating  
428 spirals resembling a micro-reentry associated with Fibrillation emerges after  
429 the collision presented with a massive blocking. See Figure 14.

430 A comparison of the patterns produced by the Nygren cell model and

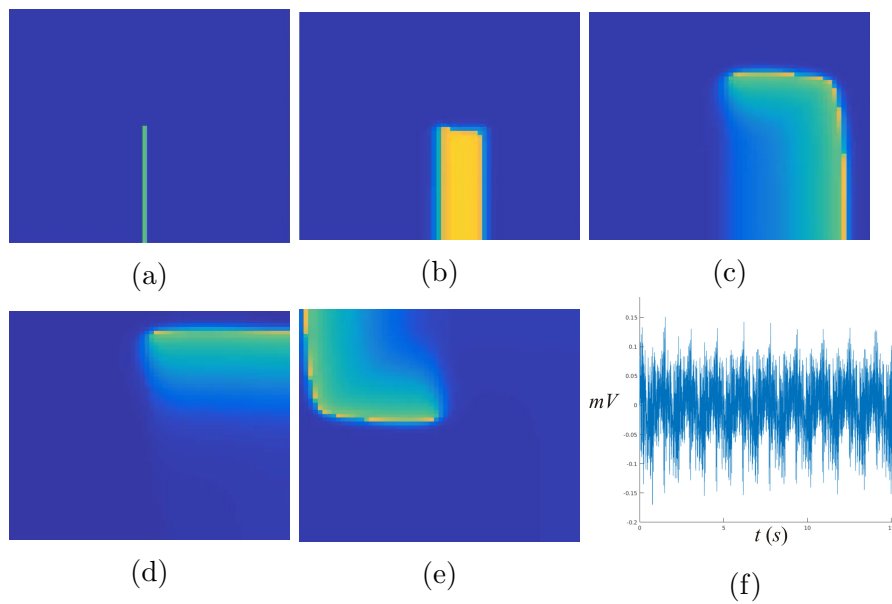

Figure (10) Nygren model in a  $60 \times 60$  net of cells produces a self-generating spiral by dynamic blocking. a) At  $t = 0$ , a group of cells is stimulated. b) A wavefront is produced. c) A self-generating spiral appears. d) Spiral collides with the border. e) Steady-state. f) Quasiperiodic pseudo-EG.

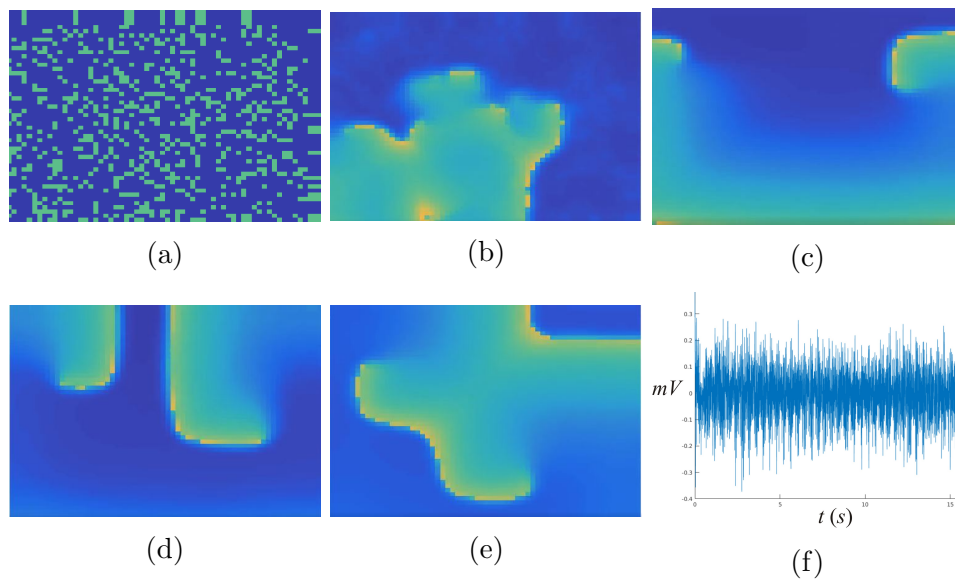

Figure (11) a) At  $t = 0$  a massive group of scattered cells through the entire  $60 \times 60$  net is stimulated randomly. b) Waves propagate at  $t = 0.001$ s. c) A couple of fronts emerge. d) Spiral after colliding produces a complex pattern e) Steady-state. f) A couple of self-generating spirals leads to a complex pseudo-EG, which may be identified with Fibrillation.

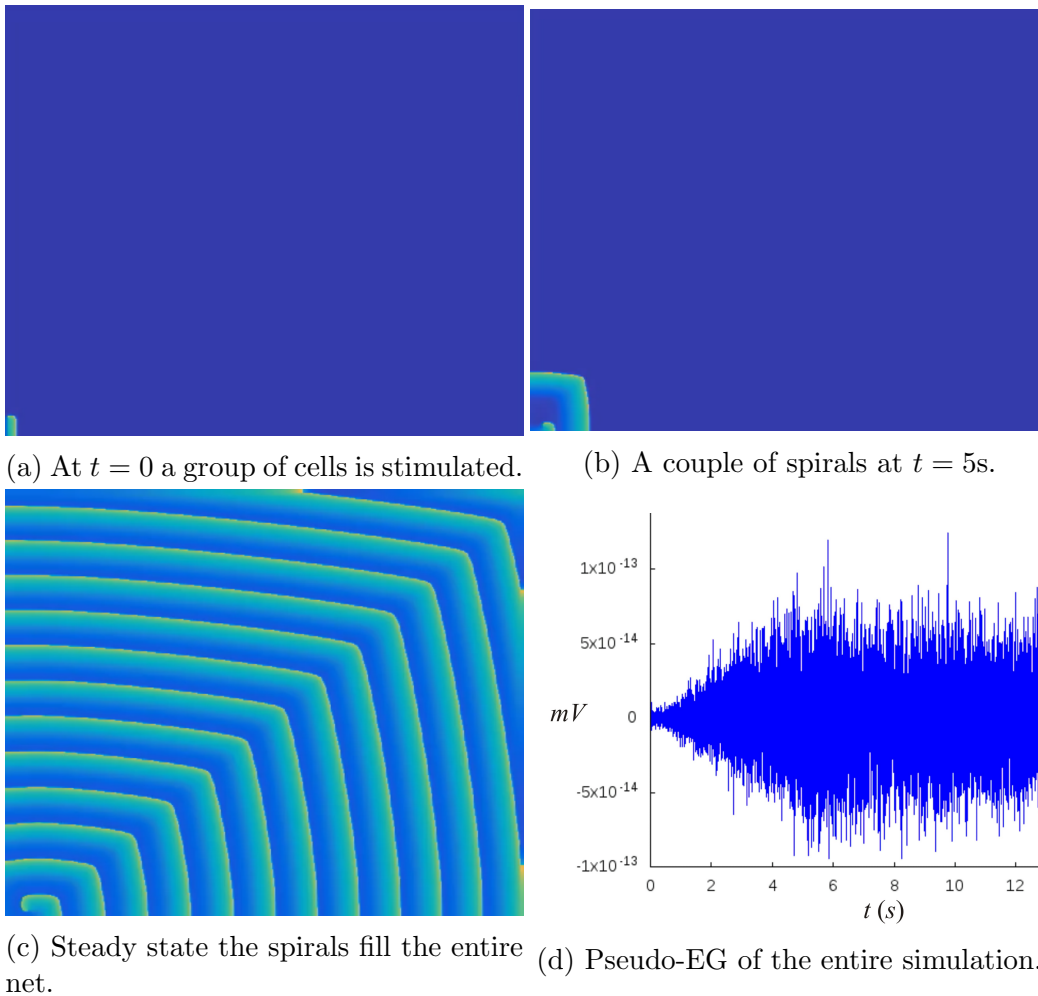

Figure (12) Nygren model in a  $600 \times 600$  net of cells produces a self-generating spiral by dynamic blocking. (a) Notice the small group of stimulated cells in the left bottom corner. (b) A series of spirals emerge. (c) Steady-state. (d) Pseudo-EG of the entire simulation.

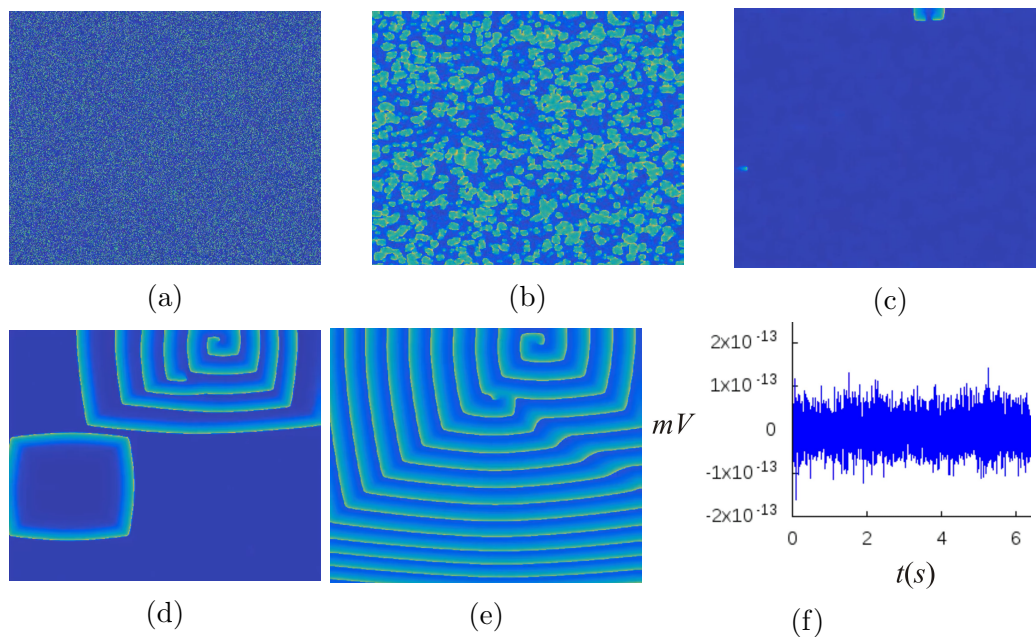

Figure (13) a) At  $t = 0$  a massive group of scattered cells through the entire net is stimulated, but each cell is surrounded by refractory cells. b) Waves propagate at  $t = 0.08s$ . c) After the collisions, only two fronts survive in this particular setting. d) Spirals are formed with the remanent waves. e) A complex pattern emerges of self-generating spirals. f) Pseudo-EG of the entire simulation.

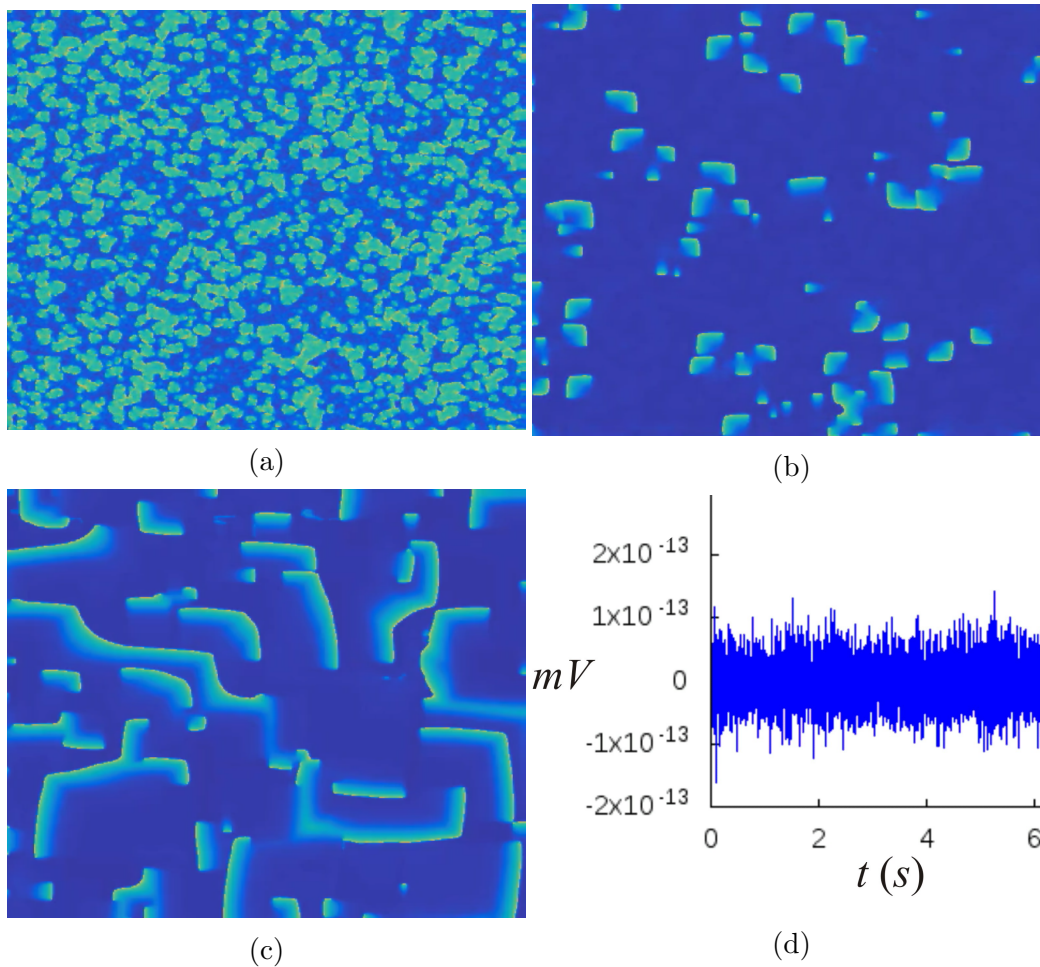

Figure (14) Under a different set of initial conditions than those in Figure 13, an intricate pattern of several self-generated spirals surges. (a) A large number of collisions of wavefronts after the massive blocking are apparent. (b) Some curved wavefronts survive after collisions. (c) Several spirals are generated with the curved wavefronts in (b) and persist in a steady complex state. (d) Pseudo-EG of the entire series.

431 the Barkley model is shown in Figure 15. Such is the pattern produced by  
432 massive blocking in a  $60 \times 60$  net.

## 433 5. Discussion

434 In many articles, one and two-dimensional arrangements (for instance,  
435 in [9] and references therein, and [41]) are considered disregarding that the  
436 actual geometry of tissue is three dimensional. This reduction in modeling is  
437 a generalized attitude that can be understood under the dynamic of building  
438 models that go from the simple to the more complicated. Nevertheless, as  
439 Fenton et al., claim [10], in models of cardiac electrical activity “simulations  
440 in 3D have shown that the existence of purely three-dimensional breakup  
441 mechanisms”. So that arrhythmias are, in this sense, three-dimensional phe-  
442 nomena virtually. Hence, to obtain more accurate models of arrhythmias, it  
443 is necessary to work in 3D frameworks, but utilizing 2D layers makes sense  
444 for the following reasons. In modeling auricular heart tissue, it is known  
445 that rotational anisotropy of fibers of ventricular muscle can be model by  
446 superposing and rotating two-dimensional layers of cells [11]. To this aim,  
447 two ways to incorporate connectivity parameters in the cells are available:  
448 experimental histological data or stochastic or complex connectivity pro-  
449 vided by mathematical models ad hoc. In this article, we used an aperiodic  
450 tiling model, which is possible to extend to 3D nets of cells. Anyhow, the  
451 extension to 3D of the aperiodic tiling model presented here is not straight-  
452 forward. Creating an adjacency matrix corresponding to aperiodic, fractal  
453 arrangements is a complex task and constitutes an open problem, although  
454 algorithms to produce many of such patterns are known (see, for instance,  
455 Rangel-Mondragon article [30]).

456 Although simplified models in one or two dimensions may reflect certain  
457 experimental data [13], it may be that such simplifications do not represent  
458 the actual behavior of big groups of cells, for instance, in the transmission  
459 of the action potential of the system formed by mixing pacemaker and atrial  
460 cells. For example, in [21] for specific mathematical models of atrial and sinus  
461 cells, the activation of the complex depends on the number of cells involved  
462 and the geometric distribution of the cells in the network. Modeling diffusive  
463 media with cells, including many observables, may not be a trivial task,  
464 since even the stability of the numerical methods involved may be challenged.  
465 Moreover, since the real geometry of the cells must be considered, real data  
466 of local topology of diffusive tissue must be incorporated, when available, to



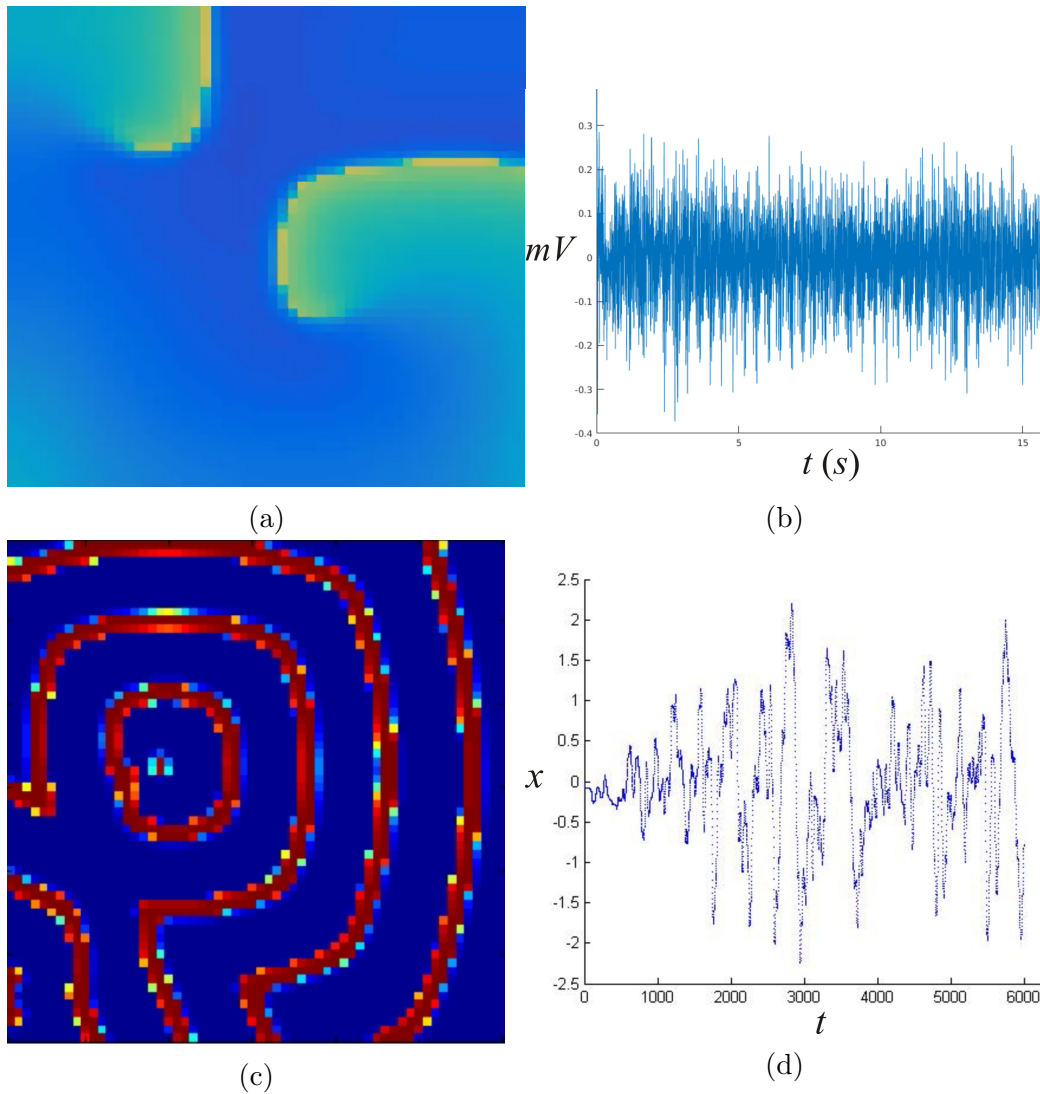

Figure (15) (a)Nygren model in a Fibrillation pattern. (b) Pseudo-EG of the Nygren model. (c) Barkley mode in a Fibrillation. (d) A massive blocking of individual cells with low conductivity produces an intricate pattern that, according to the pseudo-EG in the figure, can be identified with Fibrillation. Here we show systems of  $60 \times 60$  cells.

467 model big groups of cells. As mentioned in section 4 our representation of  
468 groups of cells in Figure 4 may not correspond to any real biological tissue,  
469 but only constitute the first approach of statistical data of a mean of the  
470 number of observed connections in the atrial heart tissue. A refinement  
471 of this data is required for the two-dimensional layers forming atrial and  
472 ventricular tissue in the heart.

473 On the other hand, many interesting works such as [36] study the stochas-  
474 tic distribution of inhomogeneities at the cellular level that can cause cardiac  
475 propagation to be stochastic. In contrast, in this article, without considering  
476 the stochastic setting, we obtained a complex propagation in the diffusive tis-  
477 sue, despite the simplicity of the included models, only by varying the local  
478 topology of the network. Nevertheless, variable conductance may be included  
479 in future work either employing stochastic distributions or, as was done in  
480 this article, introducing some aperiodic pattern of the distributions of the  
481 different conductances referred to in [36] of the individual cell membranes.

482 As a final remark, a note about our analysis of pseudo-EG. Electro-  
483 grams were statistically analyzed using the DFA technique to associate the  
484 visual behavior of the propagation of the electrical signal with a quantitative  
485 indicator of the propagation dynamics. When a scaling exponent near to  
486 0.5 was obtained, the simulated electrical signal showed a random behavior,  
487 which corresponds to what we denominated Fibrillation (Figures 11). In the  
488 electrograms where it was possible to observe a “noisy” periodic behavior,  
489 the value of the scaling exponent  $\alpha$  was near to 1, indicating long term cor-  
490 relations (i.e., a non-random behavior), which corresponds to the wave-like  
491 propagation observed in images and videos from the simulated experiments  
492 (Figures 8). From these results, we can conclude that images and videos of  
493 the propagation of the simulated electrical signals give us valuable informa-  
494 tion about their dynamics and factors affecting it, which is a crucial aspect  
495 to consider when analyzing structural and functional mechanisms triggering  
496 the different types of arrhythmias, such as atrial Fibrillation and Flutter.

## 497 6. Conclusions

498 In modeling cell-to-cell in this document, we found that very complex  
499 self-perpetuating diffusion patterns arise utilizing a massive blocking of cells  
500 in an excited state. This complexity emerges even in utilizing an elemen-  
501 tary chessboard-like distribution of cells. One remarkable property of nets  
502 of diffusive cells in this document is that reentrant waves are formed in a

503 wide variety of initial conditions contradicting the intuitive folk thinking  
504 that arrhythmia phenomena are exceptional in diffusive media, especially in  
505 considering Fibrillation.

506 We introduced a net with a tiling distribution in which Fibrillation, Flut-  
507 tering, and a sequence of Fluttering-Fibrillation phenomena emerged. In this  
508 way, the two basic types of arrhythmia were modeled in two-dimensional  
509 tissue with a degree of complexity given by the non-periodic, fractal distri-  
510 bution connections in the tiling. The interesting fact is that it is possible  
511 to model a complex-like Fibrillation phenomenon by introducing a certain  
512 degree of complexity in the distribution of neighbor cells (for example, with  
513 tiles similar to those in Figure 4), instead of using any random distribution  
514 whatsoever. To the best of the knowledge of the authors of this paper, this is  
515 a novelty. Moreover, in this study, the authors found a critical value of con-  
516 ductivity among the cells integrating the ODE's systems. Such critical value  
517 emerges with an adjacency matrix given by the arrangement in Figure 5. In  
518 this way, modeling Fluttering by lowering conductivity in our model of simple  
519 two-variable ODE or the state of the art ODE model by adding only speci-  
520 fied complexity in the distribution of cells could be relevant in mathematical  
521 modeling and computational simulation.

522 Micro-reentry can be simulated with Barkley and Nygren models. In  
523 some in silico experiments emerged several self-perpetuating waves that col-  
524 lide, leading to a complex pseudo-EG, which anyhow may be identified with  
525 Fibrillation of the system. An example of this EG for such arrhythmia is  
526 shown in Figure 15(b) for the Nygren model and Figure 15(d) for Barkley  
527 model.

## 528 **Founding**

529 This research did not receive any specific grant from funding agencies in  
530 the public, commercial, or not-for-profit sectors.

## 531 **Videos**

532 To access all the simulation videos in this document, the reader can use  
533 the following link: <http://pacifico.izt.uam.mx/aurelio/>

## 534 **References**

- 535 [1] Aliev R. R., Panfilov A. V., A Simple Two-variable Model of Cardiac  
536 Excitation. *Chaos, Solitons & Fractals* Vol 7, No. 3, pp 293-301. 1996

- 537 [2] Barkley D., Kevrekidis, I. G., *A dynamical systems approach to spiral*  
538 *wave dynamics*. Chaos 4 (3), 1994.
- 539 [3] Barkley D., *Euclidean Symmetry and Dynamics of Rotating Spiral*  
540 *Waves*. Physical Review Letters V 72, No. 1., 3 January 1994.
- 541 [4] Barkley D., et al. *Spiral-wave dynamics in a simple model of excitable*  
542 *media: The transition from simple to compound rotation*. Physical Re-  
543 view A, Rapid Communications, vol. 42, No. 4 15 August 1990.
- 544 [5] Bub G., et al. *Spiral Wave Generation in Heterogeneous Excitable Me-*  
545 *dia*. Physical Review Letters Vol 88, n. 5 February 2002.
- 546 [6] Castellanos P., Godínez R., *Autonomic nervous system regulation of the*  
547 *sinoatrial cell depolarization rate: Unifying computational models*. 37th  
548 Annual International Conference of the IEEE Engineering in Medicine  
549 and Biology Society (EMBC), pp 43-46, Aug 2015.
- 550 [7] Cherry E. M., Hatings, H. M., Evans S. T., *Dynamics of human atrial*  
551 *cell models: Restitution memory, and intracellular calcium dynamics in*  
552 *single cells*. Progress in Biophysics and Molecular Biology 98 (2008)  
553 24-37.
- 554 [8] Courtemanche M., Ramirez R., Nattel S., *Tonic mechanisms underly-*  
555 *ing human atrial action potential properties: insights from mathematical*  
556 *model*. the American Physiological Society, H301-H321 (1998).
- 557 [9] Garny A.,Kohl P.,Hunter P. J.,Boyett MR, Noble D.,*One-Dimensional*  
558 *rabbit sinoatrial node models*. J Cardiovasc Electrophysiol. (2003)  
559 14:S121S132. doi: 10.1046/j.1540.8167.90301.x
- 560 [10] Fenton F. H., et al. *Multiple Mechanisms of spiral wave breakup in a*  
561 *model of cardiac electrical activity*. Chaos, Vol. 12 No. 3, 2002.
- 562 [11] Fenton F., Karma A. *Vortex Dynamics in three-dimensional continuous*  
563 *myocardium with fiber rotation: Filament instability and Fibrillation*.  
564 Chaos Vol. 8 No. 1 1998.
- 565 [12] FitzHugh R., Impulses and physiological states in theoretical models of  
566 nerve membrane. Biophys. J. 1, 445-465 (1961)

- 567 [13] Garny et al. *Dimensionality in cardiac modelling*. Progress in Biophysics  
568 and Molecular Biology 87 (2005) 47-66.
- 569 [14] Hoppensteadt F. C., Izhikevich E. M., *Weakly connected Neural Net-*  
570 *works*. ISBN 0-387-94948-8 Springer-Verlag New York Berlin Heidelberg  
571 SPIN 10557261.
- 572 [15] Hoyt R. H., Cohen M. L., Saffitz J. E. *Distribution and three-dimensional*  
573 *structure of intercellular junctions in canine myocardium*. Circ Res.  
574 1989; 64: 563-574.
- 575 [16] Kazbanov, I., V., et al. *Effects of Heterogeneous Diffuse Fibrosis on Ar-*  
576 *rhythmia Dynamics and Dynamics*. Nature Scientific Reports—20835—  
577 DOI: 10.1038/srep20835.
- 578 [17] Keener J., Sneyd J., *Mathematical Physiology I: Cellular Physiology.*  
579 *Second Edition*. Section 6.2 pp. 231-235 Springer, ISBN 978-0-387-  
580 75846-6.
- 581 [18] Kléber A., G., et al. *Electrical Uncoupling and Increase of Extracellular*  
582 *Resistance After Induction of Ischemia in Isolated, Arterially Perfused*  
583 *Rabbit Papillary Muscle*. Circ Res. 1987 Aug;61(2):271-9.
- 584 [19] Li P., Lines G. T., Maleckar M. M., Tveito A., *Mathematical models of*  
585 *cardiac pacemaking Function*. Frontiers in Physics. October 2013, Vol.  
586 1 Article 20.
- 587 [20] Lindblad D. S., Murphey C. R., Clark J. W., Giles WR., *A model of*  
588 *the action potential and underlying membrane currents in a rabbit atrial*  
589 *cell*. Am J Physiol. 1996 Oct;271(4 Pt 2):H1666-96.
- 590 [21] López G., et al. Cell-to-cell modelling of the interface between atrial  
591 and sinoatrial anisotropic heterogeneous nets. Computational Biology  
592 and Chemistry 68 (2017) 245-259.
- 593 [22] Lugo C. A., Cantalapiedra I. R., Pearanda A., Hove-Madsen L.,  
594 Echebarria B. *Are SR Ca content fluctuations or SR refractoriness the*  
595 *key to atrial cardiac alternans?: insights from a human atrial model*.  
596 Am J Physiol Heart Circ Physiol. 2014 Jun 1;306(11):H1540-52. doi:  
597 10.1152/ajpheart.00515.2013. Epub 2014 Mar 7.

- 598 [23] Lewis, T. *The Mechanism and Graphic Registration of the Heart Beat*.  
599 London 1925.
- 600 [24] Nagumo J. S., et al. *An active pulse transmission line simulating nerve*  
601 *axon*. Proc. IRE. 50, 2061-2071
- 602 [25] Nicolás Mata A., Román Alonso G., López Garza G., Godínez Fernández  
603 J. F., Castro García M. A., Castellanos Ábrego N. M. *Parallel simulation*  
604 *of the synchronization of heterogeneous cells in the sinoatrial node*. Con-  
605 currency Computat Pract Exper. 2019;e5317. DOI: 10.1002/cpe.5317
- 606 [26] Noble D., *Modification of the Hodgking-Huxley equations applicable to*  
607 *Purkinje fibre action and pace-maker potentials*. J. Physiol. (1962), 160,  
608 pp.317-352.
- 609 [27] Nygren A., Fiset C., Firek L., Clark J. W., Lindblad D. S., Clark R. B.,  
610 Giles W. R. *Mathematical Model of an adult Human Atrial Cell. The*  
611 *Role of  $K^+$  Currents in Repolarization*. Circ Res. 1998; 63-81.
- 612 [28] Oren R. V., Clancy C., E., *Determinants of heterogeneity, Excitation*  
613 *and Conduction in the Sinoatrial Node: A Model Study*. PLoS Comput  
614 Biol 6(12): e1001041. doi:10.1371/journal.pcbi.1001041.
- 615 [29] Peng C. K., Havlin S., Stanley H.E., Goldberg A., L., *Quantification of*  
616 *scaling sponents and crossover phenomena in nonstationary heart beat*  
617 *time series*. Chaos 5, 82 (1995); doi: 10.1063/1.166141
- 618 [30] Rangel-Mondragon J., *Polyominoes and Related Families*. The Mathe-  
619 matica Journal 9:3 2005 Wolfram Media, Inc.
- 620 [31] Rubinov M., Sporns O., *Complex network measures of brain connectiv-*  
621 *ity: Uses and interpretations*. Neuroimage 52 (2010) 1059-1069.
- 622 [32] Robinson E. A., *On the table and the chair*. Indag. Mathem.,N.S., 10  
623 (4), 581-599.
- 624 [33] Saoudi N., et al. *A classification of atrial flutter and regu-*  
625 *lar atrial tachycardia according to electrophysiological mecha-*  
626 *nisms and anatomical bases*. European Heart Journal (2001)  
627 22, 11621182 doi:10.1053/euhj.2001.2658, available online at  
628 <http://www.idealibrary.com>

- 629 [34] Savalia S., Emamian V., *Cardiac Arrhythmia Classification by Multi-*  
630 *Layer Perceptron and Convolution Neural Networks.* Bioengineering  
631 2018, 5, 35; doi:10.3390/bioengineering5020035
- 632 [35] Shimada T. et al. *Cytoarchitecture and Intercalated Disks of the Working*  
633 *Myocardium and the Conduction System in the Mammalian Heart.* The  
634 anatomical Record Part A 280A:940-951 (2004).
- 635 [36] Spach M. S., Heidlage J. F., *The stochastic Nature of Cardiac Propaga-*  
636 *tion at a microscopic Level.*
- 637 [37] Waldo A, L., *Mechanisms of atrial flutter and atrial Fibrillation: distinc*  
638 *entities or tow sides of a coin?* Cardiovascular Research 54 (2002) 217-  
639 229.
- 640 [38] Wiener N., Rosenblueth A., *The Mathematical Formulation of the Prob-*  
641 *lem of Conduction of Impulses in a Network of Connected Excitable*  
642 *Elements, Specifically in Cardiac Muscle.* Archivos del Instituto de Car-  
643 diología de México;ao 16 Tomo XVI 1946 Nos. 3 y 4.
- 644 [39] Wiener N. and Wintner A. *The discrete chaos.* Amer. J. Math., 65:  
645 279-298.
- 646 [40] Zhang H., Holden A. *Chaotic Menander of Spiral Waves in the*  
647 *FitzHugh-Nagumo System.* Chaos, Solitons & Fractals Vol 5, Nos 3/4,  
648 pp 661-670, 1995.
- 649 [41] Zhang H., Holden A., Kodama I., Honjo H, Lei M., Varghese T., et  
650 al. Mathematical models of action potentials in the periphery and center  
651 of the rabbit sinoatrial node. Am J Physiol Heart Circ Physiol.  
652 (2000) 279:H397H421. Available online at: <http://ajpheart.physiology.org/content/279/1/H397>  
653
- 654 [42] Zacharia A. M., et al. *Cardiac Arrhythmia Classification Using Atrial*  
655 *Activity Signal.* Procedia Technology 24 ( 2016 ) 1406 1414.
